# Supplementary material
Source: PubMed Central journal article supplement (PMC2753794)
Supplement: NIHMS128680-supplement-Supplementary_Material.pdf [file NIHMS128680-supplement-Supplementary_Material.pdf]

The Supplement file contains the lists of genes that were associated with defects in G1 and G2 checkpoint responses to DNA damage in melanocyte and melanoma lines, using either significance analysis of microarrays (SAM) or the Bayesian approach described in Materials and Methods. The first page contains the gene names as given by Agilent. The second-fifth pages give the Agilent probe identification numbers and other identifiers for gene annotation. Pages 8 and 10 also include the gene ontology categories that were determined by the Expression Analysis Systematic Explorer (<http://david.niaid.nih.gov/david/ease/htm>) to be significantly enriched ( $<0.05$ ) in the gene list.

**Genes that discriminate effective and defective G1 and G2 checkpoint functions in melanomas**

| <b>G1 checkpoint</b> |                 | <b>G2 checkpoint</b> |                 |
|----------------------|-----------------|----------------------|-----------------|
| <b>SAM</b>           | <b>Bayesian</b> | <b>SAM</b>           | <b>Bayesian</b> |
| AGL                  | ABR             | FANCC                | AC027607        |
| ARCN1                | AC007282        | NM_001031617         | AC108673        |
| CD59                 | AC087588        | PRX                  | AC140134        |
| CDCA7                | AC117456        | THC1410663           | ACSL3           |
| CDKN1A               | AC135893        |                      | AK000776        |
| CKS1B                | AF218008        |                      | ALMS1           |
| DDB2                 | AL023656        |                      | APG12L          |
| EFEMP2               | ATOH8           |                      | ARV1            |
| ENST00000312688      | ATP6AP1         |                      | ASMTL           |
| ENST00000317094      | BBC3            |                      | BCAP29          |
| ENST00000324418      | BC009385        |                      | BE018697        |
| ENST00000328779      | BC020859        |                      | BTN2A2          |
| ENST00000329179      | BC038466        |                      | C10orf57        |
| ENST00000330973      | BCLAF1          |                      | C13orf1         |
| ENST00000333058      | C10orf4         |                      | C13orf9         |
| FLJ10330             | C11orf24        |                      | C14orf142       |
| FLJ31153             | C1orf41         |                      | C14orf168       |
| FUSIP1               | C6orf75         |                      | C14orf31        |
| I_1842444            | C6orf75         |                      | C16orf28        |
| I_3252275            | CARD9           |                      | C18orf25        |
| ITGA3                | CCNB1           |                      | C19orf13        |
| MTVR1                | CD59            |                      | C20orf149       |
| RPL5                 | CDC2            |                      | C20orf55        |
| SLC12A4              | CDC7            |                      | C21orf63        |
| THC1444796           | CDCA7           |                      | CABLES2         |
| TPTE                 | CDKN1A          |                      | CAPZA2          |
|                      | CGI-94          |                      | COG1            |
|                      | CKS1B           |                      | CTL2            |
|                      | CORT            |                      | CTSC            |
|                      | CSE-C           |                      | DATF1           |
|                      | DCTN2           |                      | DDX55           |

|                 |                 |
|-----------------|-----------------|
| DDB2            | DKFZP434A1319   |
| DDX18           | DKFZP566E144    |
| DPP7            | DNCI1           |
| DYRK2           | EFNB1           |
| ECT2            | EIF4EBP2        |
| EFEMP2          | ENST00000297649 |
| EML4            | ENST00000299623 |
| ENG             | ENST00000313590 |
| ENST00000249480 | ENST00000314100 |
| ENST00000312441 | ENST00000321656 |
| ENST00000312688 | ENST00000323263 |
| ENST00000313760 | ENST00000325703 |
| ENST00000314726 | ENST00000328473 |
| ENST00000315741 | ENST00000328941 |
| ENST00000317094 | ENST00000329561 |
| ENST00000318629 | ENST00000330356 |
| ENST00000328480 | ENST00000330972 |
| ENST00000333571 | ENST00000331540 |
| FAM49B          | ENST00000332277 |
| FBXW5           | ENST00000332832 |
| FGFR1           | ENST00000333636 |
| FIBP            | FAM32A          |
| FLJ10647        | FBXO22          |
| FLJ11259        | FCGR2A          |
| FLJ12484        | FEM1C           |
| FLJ13448        | FLJ21865        |
| FLJ13855        | FLJ37953        |
| FLJ20850        | FTHFSDC1        |
| FLJ21827        | GLRX            |
| FLJ23233        | GLS             |
| FLJ35740        | GNG12           |
| GABARAPL1       | GRB2            |
| GAJ             | GTF2H2          |
| GCSH            | HAN11           |
| GMNN            | HCFC2           |
| HACE1           | HNRPA0          |
| HDAC2           | HOXB2           |
| HRI             | HSC20           |
| HSF2            | HSPA4           |
| HSPC133         | I_1000003       |
| I_1000644       | I_1868291       |
| I_1938997       | I_3202278       |
| I_1950158       | I_958209        |
| I_3584237       | I_959101        |
| IL6ST           | I_963398        |
| ITGA3           | JM11            |
| KIAA0830        | KIAA0433        |
| KIAA1005        | KIAA0828        |
| LASS6           | LIPE            |

|              |              |
|--------------|--------------|
| LDHA         | LOC146346    |
| LIN9         | LOC200916    |
| LOC201191    | LOC284001    |
| LOC255374    | LOC348926    |
| LOC348262    | LOC51234     |
| LOC374395    | LOC54499     |
| LOC399818    | LOC90355     |
| LOC51035     | LOC96610     |
| LRP10        | MAP3K14      |
| LYPDC1       | MGC10067     |
| MAN2B1       | MGC16279     |
| MAP3K10      | MGC17943     |
| MCFD2        | MGC4093      |
| MCOLN1       | MGC5509      |
| MDC1         | MKNK2        |
| MDM4         | MRPL18       |
| MED19        | MRPL45       |
| MGC17839     | MtFMT        |
| MGC21654     | NDUFB5       |
| MGC34079     | NM_001029857 |
| MGC40157     | NM_014951    |
| MGC4728      | NM_133458    |
| MRPL47       | NM_145111    |
| MRS2L        | NPAS2        |
| MTVR1        | NPM1         |
| NAGK         | NUFIP1       |
| NM_001008897 | OCIL         |
| NM_001012507 | OGG1         |
| NM_001012507 | PDXK         |
| NM_001017408 | PHKA2        |
| NM_001023571 | PMPCB        |
| NM_001025160 | PPM1E        |
| NM_001029896 | PRKAA1       |
| NM_001031734 | PRX          |
| NM_001033085 | PTPN11       |
| NM_001033582 | RAM2         |
| NM_018908    | RIPK4        |
| NR_002225    | RNASEH1      |
| NS5ATP13TP2  | RNMT         |
| ORC3L        | RSNL2        |
| OTUB1        | SCYE1        |
| PEX3         | SENP3        |
| PFDN5        | SF3A3        |
| PHF6         | SIAT8A       |
| PPP1R16B     | SIVA         |
| PRAF2        | SLC2A8       |
| PRPF4B       | SMCR7        |
| PSAP         | SMN2         |
| PSMD8        | SNAPC5       |

|            |            |
|------------|------------|
| PTPN2      | TESK1      |
| PXMP2      | THC1410663 |
| RAD50      | THC1430719 |
| RBKS       | THC1438380 |
| RFC4       | THC1501849 |
| RGS16      | THC1525200 |
| ROM1       | THC1550605 |
| RPA3       | TNFRSF6B   |
| RRM2B      | TRIM59     |
| SAMD4      | TU12B1-TY  |
| SFRS3      | UBE2H      |
| SIAT7F     | UBE3C      |
| SLC12A4    | UBQLN2     |
| SLC35C1    | UCHL5      |
| SLC39A13   | VIL2       |
| SLC6A8     | VPS45A     |
| SRPK1      | XM_090998  |
| SSNA1      | XM_208658  |
| TAF1B      | XM_301800  |
| TAF4       | ZNF265     |
| THC1444796 |            |
| THC1448734 |            |
| THC1467304 |            |
| THC1486425 |            |
| THC1503623 |            |
| THC1538371 |            |
| TMAP1      |            |
| TncRNA     |            |
| TNFRSF10B  |            |
| TPTE       |            |
| TTRAP      |            |
| TXN        |            |
| U60899     |            |
| Ufm1       |            |
| WAC        |            |
| XM_371884  |            |
| ZNF326     |            |
| ZNF524     |            |

Genes that are associated with G1 checkpoint function by Bayesian analysis

| SUID                        | GeneSymbol | CLID      | Accession | LLID   | ChromosomeLocation           | Cytoband |
|-----------------------------|------------|-----------|-----------|--------|------------------------------|----------|
| AGI_HUM1_OLIGO_A_23_P503182 | ABR        | Hs.159306 | NM_021962 |        | 29 chr17:891700-891641       | 17p13.3  |
| AGI_HUM1_OLIGO_A_23_P142878 | ATOH8      | Hs.135569 | NM_032827 | 84913  | chr2:85989408-85989467       | 2p11.2   |
| AGI_HUM1_OLIGO_A_24_P74753  | ATP6AP1    | Hs.6551   | NM_001183 | 537    | chrX:152131734-152131969     | Xq28     |
| AGI_HUM1_OLIGO_A_24_P305312 | BBC3       | Hs.467020 | NM_014417 | 27113  | chr19:52416986-52416927      | 19q13.32 |
| AGI_HUM1_OLIGO_A_24_P89512  | BCLAF1     | Hs.486542 | NM_014739 | 9774   | chr6:136560399-136560340     | 6q23.3   |
| AGI_HUM1_OLIGO_A_24_P30141  | C10orf4    | Hs.303727 | NM_145246 | 118924 | chr10:95093466-95093407      | 10q23.33 |
| AGI_HUM1_OLIGO_A_23_P12911  | C11orf24   | Hs.303025 | NM_022338 | 53838  | chr11:67804430-67804371      | 11q13.2  |
| AGI_HUM1_OLIGO_A_23_P96872  | C1orf41    | Hs.525462 | NM_016126 | 51668  | chr1:53759520-53757325       | 1p32.3   |
| AGI_HUM1_OLIGO_A_24_P89509  | C6orf75    | Hs.404186 | NM_021820 | 60487  | chr6:126313010-126313069     | 6q22.32  |
| AGI_HUM1_OLIGO_A_24_P180830 | CARD9      | Hs.528581 | NM_052813 | 64170  | chr9:134615587-134615528     | 9q34.3   |
| AGI_HUM1_OLIGO_A_23_P122197 | CCNB1      | Hs.23960  | NM_031966 | 891    | chr5:68487247-68489007       | 5q13.2   |
| AGI_HUM1_OLIGO_A_32_P50275  | CD59       | Hs.278573 | AK095453  | 966    | chr11:33692213-33692272      | 11p13    |
| AGI_HUM1_OLIGO_A_32_P87849  | CDC2       | Hs.334562 | NM_033379 | 983    |                              |          |
| AGI_HUM1_OLIGO_A_23_P148807 | CDC7       | Hs.533573 | NM_003503 | 8317   | chr1:91462848-91462907       | 1p22.1   |
| AGI_HUM1_OLIGO_A_24_P171549 | CDCA7      | Hs.470654 | AK075134  | 83879  | chr2:174435437-174435496     | 2q31.2   |
| AGI_HUM1_OLIGO_A_24_P89457  | CDKN1A     | Hs.370771 | L47232    | 1026   | chr6:36699033-36699092       | 6p21.31  |
| AGI_HUM1_OLIGO_A_23_P11774  | CGI-94     | Hs.472038 | NM_016037 | 51118  | chr1:37902576-37902635       | 1p34.3   |
| AGI_HUM1_OLIGO_A_23_P45917  | CKS1B      | Hs.374378 | NM_001826 | 1163   | chr1:152168319-152168378     | 1q22     |
| AGI_HUM1_OLIGO_A_24_P246926 | CORT       | Hs.412311 | NM_001302 | 1325   | chr1:10221184-10221243       | 1p36.22  |
| AGI_HUM1_OLIGO_A_23_P24616  | CSE-C      | Hs.10056  | NM_170601 | 54414  | chr11:124043869-124043810    | 11q24.2  |
| AGI_HUM1_OLIGO_A_23_P76059  | DCTN2      | Hs.289123 | AK096242  | 10540  | chr12:56210315-56210256      | 12q13.3  |
| AGI_HUM1_OLIGO_A_23_P52610  | DDB2       | Hs.446564 | NM_000107 | 1643   | chr11:47224932-47224991      | 11p11.2  |
| AGI_HUM1_OLIGO_A_24_P165736 | DDX18      | Hs.363492 | AK091227  | 8886   | chr2:118683855-118683914     | 2q14.1   |
| AGI_HUM1_OLIGO_A_23_P32975  | DPP7       | Hs.37916  | BC016961  | 29952  | chr9:135362411-135362393     | 9q34.3   |
| AGI_HUM1_OLIGO_A_24_P942786 | DYRK2      | Hs.173135 | AK024870  | 8445   | chr12:66344810-66344869      | 12q15    |
| AGI_HUM1_OLIGO_A_24_P366033 | ECT2       | Hs.518299 | AK023267  | 1894   | chr3:173841337-173841396     | 3q26.31  |
| AGI_HUM1_OLIGO_A_23_P24414  | EFEMP2     | Hs.381870 | AB030655  | 30008  | chr11:65410842-65410783      | 11q13.1  |
| AGI_HUM1_OLIGO_A_24_P273413 | EML4       | Hs.432438 | AK001804  | 27436  | chr2:42458223-42458282       | 2p21     |
| AGI_HUM1_OLIGO_A_23_P83328  | ENG        | Hs.76753  | NM_000118 | 2022   | chr9:12595516-125954362      | 9q34.11  |
| AGI_HUM1_OLIGO_A_23_P43255  | FAM49B     | Hs.492869 | NM_016623 | 51571  | chr8:130810442-130810383     | 8q24.21  |
| AGI_HUM1_OLIGO_A_23_P112397 | FBXW5      | Hs.522507 | NM_018998 | 54461  | chr9:135192615-135192556     | 9q34.3   |
| AGI_HUM1_OLIGO_A_24_P902338 | FGFR1      | Hs.264887 | AI821117  | 2260   | chr8:38323429-38323488       | 8p12     |
| AGI_HUM1_OLIGO_A_23_P1615   | FIBP       | Hs.7768   | NM_004214 | 9158   | chr11:65430444-65429208      | 11q13.1  |
| AGI_HUM1_OLIGO_A_23_P62831  | FLJ10647   | Hs.87016  | NM_018166 | 55194  | chr1:36215557-36215498       | 1p34.3   |
| AGI_HUM1_OLIGO_A_24_P381455 | FLJ11259   | Hs.525634 | BC018435  | 55332  | chr12:100797541-100797600    | 12q23.2  |
| AGI_HUM1_OLIGO_A_23_P206077 | FLJ12484   | Hs.436102 | NM_022767 | 64782  | chr15:86904669-86904727      | 15q26.2  |
| AGI_HUM1_OLIGO_A_23_P102037 | FLJ13448   | Hs.288945 | NM_025147 | 80219  | chr2:198541432-198541491     | 2q33.1   |
| AGI_HUM1_OLIGO_A_24_P378506 | FLJ13855   | Hs.514297 | NM_023079 | 65264  | chr17:47480045-47480104      | 17q21.32 |
| AGI_HUM1_OLIGO_A_23_P67589  | FLJ20850   | Hs.30783  | NM_017967 | 55049  | chr19:18563951-18564010      | 19p13.11 |
| AGI_HUM1_OLIGO_A_23_P116207 | FLJ21827   | Hs.533738 | NM_020153 | 56912  | chr11:117954182-117953825    | 11q23.3  |
| AGI_HUM1_OLIGO_A_23_P164638 | FLJ23233   | Hs.98593  | NM_024691 | 79744  | chr19:62697315-62697374      | 19q13.43 |
| AGI_HUM1_OLIGO_A_32_P17577  | FLJ35740   | Hs.535962 | AK058117  | 253650 | chr9:38557353-38557294       | 9p13.1   |
| AGI_HUM1_OLIGO_A_24_P4816   | GABARAPL1  | Hs.524250 | NM_031412 | 23710  | chr12:10265943-10266002      | 12p13.2  |
| AGI_HUM1_OLIGO_A_23_P133123 | GAJ        | Hs.294088 | NM_032117 | 84057  | chr4:154913612-154913671     | 4q31.3   |
| AGI_HUM1_OLIGO_A_32_P57702  | GCSH       | Hs.546256 | NM_004483 | 2653   |                              |          |
| AGI_HUM1_OLIGO_A_23_P19712  | GMNN       | Hs.234896 | NM_015895 | 51053  | chr6:24894087-24894146       | 6p22.2   |
| AGI_HUM1_OLIGO_A_23_P250002 | HACE1      | Hs.434340 | AB037741  | 57531  | chr6:105221987-105221928     | 6q16.3   |
| AGI_HUM1_OLIGO_A_23_P122304 | HDAC2      | Hs.3352   | NM_001527 | 3066   | chr6:114308443-114307765     | 6q21     |
| AGI_HUM1_OLIGO_A_24_P123768 | HRI        | Hs.520205 | AB037790  | 27102  | chr7:5806795-5806736         | 7p22.1   |
| AGI_HUM1_OLIGO_A_32_P9963   | HSF2       | Hs.158195 | NM_004506 | 3298   | chr6:122734475-122734534     | 6q22.31  |
| AGI_HUM1_OLIGO_A_23_P142634 | HSPC133    | Hs.470553 | NM_014168 | 29081  | chr2:170874553-170871525     | 2q31.1   |
| AGI_HUM1_OLIGO_A_24_P935033 | IL6ST      | Hs.532082 | U58146    | 3572   | chr5:55260652-55260584       | 5q11.2   |
| AGI_HUM1_OLIGO_A_23_P55251  | ITGA3      | Hs.265829 | NM_005501 | 3675   | chr17:48642003-48642062      | 17q21.33 |
| AGI_HUM1_OLIGO_A_23_P104624 | KIAA0830   | Hs.167115 | AB020637  | 23052  | chr11:94553745-94553804      | 11q21    |
| AGI_HUM1_OLIGO_A_32_P123966 | KIAA1005   | Hs.298382 | AB023222  | 23322  | chr16:53414191-53414132      | 16q12.2  |
| AGI_HUM1_OLIGO_A_32_P5480   | LASS6      | Hs.506829 | AK024891  | 253782 | chr2:169833547-169833606     | 2q24.3   |
| AGI_HUM1_OLIGO_A_23_P47565  | LDHA       | Hs.2795   | NM_005566 | 3939   | chr11:18393098-18393157      | 11p15.1  |
| AGI_HUM1_OLIGO_A_32_P233304 | LIN9       | Hs.120817 | NM_173083 | 286826 | chr1:223393638-223393579     | 1q42.12  |
| AGI_HUM1_OLIGO_A_24_P185186 | LOC201191  | Hs.546517 | NM_174920 | 201191 | chr17:48665938-48665004      | 17q21.33 |
| AGI_HUM1_OLIGO_A_24_P221198 | LOC255374  | Hs.257126 | BC031288  | 255374 | chr7:99337333-99337392       | 7q22.1   |
| AGI_HUM1_OLIGO_A_24_P237878 | LOC348262  | Hs.514632 | BC041068  | 348262 | chr17_random:2179431-2179372 |          |
| AGI_HUM1_OLIGO_A_24_P86868  | LOC399818  | Hs.468488 | AF318345  | 399818 | chr10:126023341-126023282    | 10q26.13 |
| AGI_HUM1_OLIGO_A_24_P258277 | LOC51035   | Hs.351296 | NM_015853 | 51035  | chr11:62220372-62219801      | 11q12.3  |
| AGI_HUM1_OLIGO_A_24_P99216  | LRP10      | Hs.525232 | NM_014045 | 26020  | chr14:21336113-21336293      | 14q11.2  |
| AGI_HUM1_OLIGO_A_32_P101031 | LYPD1      | Hs.432395 | AK075487  | 116372 | chr2:133613259-133613200     | 2q21.2   |
| AGI_HUM1_OLIGO_A_24_P370156 | MAN2B1     | Hs.356769 | U68382    | 4125   | chr19:12621201-12621018      | 19p13.2  |
| AGI_HUM1_OLIGO_A_24_P284523 | MAP3K10    | Hs.466743 | NM_002446 | 4294   | chr19:45413243-45413302      | 19q13.2  |
| AGI_HUM1_OLIGO_A_24_P103060 | MCFD2      | Hs.293689 | NM_139279 | 90411  | chr2:47104675-47104616       | 2p21     |
| AGI_HUM1_OLIGO_A_23_P27571  | MCOLN1     | Hs.546413 | NM_020533 | 57192  | chr19:7499764-7499823        | 19p13.2  |
| AGI_HUM1_OLIGO_A_23_P19455  | MDC1       | Hs.433653 | D79992    | 9656   | chr6:30773963-30773904       | 6p21.33  |
| AGI_HUM1_OLIGO_A_24_P927377 | MDM4       | Hs.497492 | BM893624  | 4194   |                              |          |
| AGI_HUM1_OLIGO_A_23_P150510 | MED19      | Hs.43619  | NM_153450 | 219541 | chr11:57246727-57246668      | 11q12.1  |

|                             |             |           |           |        |                           |          |
|-----------------------------|-------------|-----------|-----------|--------|---------------------------|----------|
| AGI_HUM1_OLIGO_A_23_P329890 | MGC17839    | Hs.380228 | NM_174926 | 219902 | chr11:119738903-119738962 | 11q23.3  |
| AGI_HUM1_OLIGO_A_23_P334218 | MGC21654    | Hs.492716 | NM_145647 | 93594  | chr8:124120749-124120808  | 8q24.13  |
| AGI_HUM1_OLIGO_A_24_P373726 | MGC34079    | Hs.440722 | BC025783  | 147687 | chr19:63112512-63112453   | 19q13.43 |
| AGI_HUM1_OLIGO_A_24_P339272 | MGC40157    | Hs.368934 | NM_152350 | 125144 | chr17:16543279-16543583   | 17p11.2  |
| AGI_HUM1_OLIGO_A_23_P153256 | MGC4728     | Hs.230260 | AK057209  | 374928 | chr19:62710815-62710874   | 19q13.43 |
| AGI_HUM1_OLIGO_A_23_P502425 | MRPL47      | Hs.283734 | NM_020409 | 57129  | chr3:180627615-180627556  | 3q26.33  |
| AGI_HUM1_OLIGO_A_23_P111373 | MRS2L       | Hs.533291 | NM_020662 | 57380  | chr6:24532216-24532275    | 6p22.2   |
| AGI_HUM1_OLIGO_A_24_P925586 | MTVR1       | Hs.25723  | AF085877  | 23625  | chr11:65112557-65112498   | 11q13.1  |
| AGI_HUM1_OLIGO_A_23_P154208 | NAGK        | Hs.7036   | NM_017567 | 55577  | chr2:71274388-71275177    | 2p13.3   |
| AGI_HUM1_OLIGO_A_24_P940763 | NS5ATP13TP2 | Hs.445081 | AK021720  | 220323 |                           |          |
| AGI_HUM1_OLIGO_A_23_P42045  | ORC3L       | Hs.410228 | NM_181837 | 23595  | chr6:88372512-88372571    | 6q15     |
| AGI_HUM1_OLIGO_A_24_P52801  | OTUB1       | Hs.473788 | AF161381  | 55611  | chr11:63539433-63539700   | 11q13.1  |
| AGI_HUM1_OLIGO_A_24_P794892 | PEX3        | Hs.7277   | BF439431  | 8504   | chr6:143783804-143783745  | 6q24.2   |
| AGI_HUM1_OLIGO_A_24_P181120 | PFDN5       | Hs.288856 | NM_002624 | 5204   | chr12:51978186-51979363   | 12q13.13 |
| AGI_HUM1_OLIGO_A_32_P229299 | PHF6        | Hs.356501 | NM_032458 | 84295  | chrX:132268337-132268396  | Xq26.2   |
| AGI_HUM1_OLIGO_A_32_P97763  | PPP1R16B    | Hs.45719  | NM_015568 | 26051  | chr20:38234443-38234502   | 20q11.23 |
| AGI_HUM1_OLIGO_A_23_P96350  | PRAF2       | Hs.29595  | NM_007213 | 11230  | chrX:47955072-47955013    | Xp11.23  |
| AGI_HUM1_OLIGO_A_24_P941787 | PRPF4B      | Hs.159014 | NM_003913 | 8899   | chr6:4010126-4010185      | 6p25.2   |
| AGI_HUM1_OLIGO_A_24_P309317 | PSAP        | Hs.523004 | AK057878  | 5660   | chr10:72923863-72923451   | 10q22.1  |
| AGI_HUM1_OLIGO_A_23_P67466  | PSMD8       | Hs.78466  | NM_002812 | 5714   | chr19:43563453-43564629   | 19q13.2  |
| AGI_HUM1_OLIGO_A_23_P309701 | PTPN2       | Hs.123352 | NM_002828 | 5771   | chr18:12784039-12783980   | 18p11.21 |
| AGI_HUM1_OLIGO_A_24_P918065 | PXMP2       | Hs.430299 | BC009836  | 5827   | chr12:131520348-131520289 | 12q24.33 |
| AGI_HUM1_OLIGO_A_24_P226198 | RAD50       | Hs.242635 | NM_005732 | 10111  | chr5:132055291-132055350  | 5q23.3   |
| AGI_HUM1_OLIGO_A_23_P9523   | RBKS        | Hs.11916  | NM_022128 | 64080  | chr2:27979079-27979020    | 2p23.2   |
| AGI_HUM1_OLIGO_A_23_P18196  | RFC4        | Hs.518475 | NM_002916 | 5984   | chr3:187829043-187828914  | 3q27.3   |
| AGI_HUM1_OLIGO_A_23_P320578 | RGS16       | Hs.413297 | NM_002928 | 6004   | chr1:179807311-179807252  | 1q25.3   |
| AGI_HUM1_OLIGO_A_23_P105002 | ROM1        | Hs.281564 | NM_000327 | 6094   | chr11:62157864-62157923   | 11q12.3  |
| AGI_HUM1_OLIGO_A_23_P256455 | RPA3        | Hs.487540 | NM_002947 | 6119   | chr7:7421019-7420960      | 7p21.3   |
| AGI_HUM1_OLIGO_A_23_P20225  | RRM2B       | Hs.512592 | NM_015713 | 50484  | chr8:103173817-103173758  | 8q22.3   |
| AGI_HUM1_OLIGO_A_24_P383523 | SAMD4       | Hs.98259  | NM_015589 | 23034  | chr14:53245762-53245821   | 14q22.2  |
| AGI_HUM1_OLIGO_A_32_P68516  | SFRS3       | Hs.405144 | AL050041  | 6428   | chr6:36616726-36616667    | 6p21.31  |
| AGI_HUM1_OLIGO_A_23_P315892 | SIAT7F      | Hs.109672 | NM_013443 | 30815  | chr9:126024169-126024110  | 9q34.11  |
| AGI_HUM1_OLIGO_A_23_P389391 | SLC12A4     | Hs.10094  | NM_005072 | 6560   | chr16:67754821-67754762   | 16q22.1  |
| AGI_HUM1_OLIGO_A_23_P202720 | SLC35C1     | Hs.12211  | NM_018389 | 55343  | chr11:45798676-45798735   | 11p11.2  |
| AGI_HUM1_OLIGO_A_23_P24345  | SLC39A13    | Hs.523664 | NM_152264 | 91252  | chr11:47402247-47402306   | 11p11.2  |
| AGI_HUM1_OLIGO_A_24_P23400  | SLC6A8      | Hs.540696 | U17986    | 6535   | chrX:151427550-151427609  | Xq28     |
| AGI_HUM1_OLIGO_A_23_P19543  | SRPK1       | Hs.443861 | NM_003137 | 6732   | chr6:35847812-35847753    | 6p21.31  |
| AGI_HUM1_OLIGO_A_24_P303915 | SSNA1       | Hs.530314 | NM_003731 | 8636   | chr9:135441577-135441636  | 9q34.3   |
| AGI_HUM1_OLIGO_A_23_P165891 | TAF1B       | Hs.128275 | NM_005680 | 9014   | chr2:10081532-10081591    | 2p25.1   |
| AGI_HUM1_OLIGO_A_23_P80062  | TAF4        | Hs.473243 | NM_003185 | 6874   | chr20:61235816-61235757   | 20q13.33 |
| AGI_HUM1_OLIGO_A_32_P204691 | TMAP1       | Hs.250723 | BC038747  | 439921 | chr17:75266785-75266844   | 17q25.1  |
| AGI_HUM1_OLIGO_A_24_P566916 | TncRNA      | Hs.523789 | AK027191  | 283131 | chr11:64968634-64968693   | 11q13.1  |
| AGI_HUM1_OLIGO_A_24_P218265 | TNFRSF10B   | Hs.521456 | NM_003842 | 8795   | chr8:22899773-22899714    | 8p21.2   |
| AGI_HUM1_OLIGO_A_32_P64966  | TPTE        | Hs.122986 | NM_013315 | 7179   | chr21:10010084-10007359   | 21p11.2  |
| AGI_HUM1_OLIGO_A_23_P8311   | TTRAP       | Hs.403010 | NM_016614 | 51567  | chr6:24758372-24758313    | 6p22.2   |
| AGI_HUM1_OLIGO_A_24_P175519 | TXN         | Hs.435136 | NM_003329 | 7295   | chr9:108392960-108386925  | 9q31.3   |
| AGI_HUM1_OLIGO_A_24_P313109 | Ufm1        | Hs.524969 | NM_016617 | 51569  | chr13:36734027-36734086   | 13q13.3  |
| AGI_HUM1_OLIGO_A_23_P201998 | WAC         | Hs.435610 | NM_016628 | 51322  | chr10:28913670-28913729   | 10p12.1  |
| AGI_HUM1_OLIGO_A_24_P83437  | ZNF326      | Hs.306221 | NM_181781 | 284695 | chr1:89937780-89937839    | 1p22.2   |
| AGI_HUM1_OLIGO_A_23_P376735 | ZNF524      | Hs.440291 | NM_153219 | 147807 | chr19:60806186-60806245   | 19q13.42 |

GO analysis results

| System                | Gene Category                            | EASE scor | Gene Symbol                                                                                                       |
|-----------------------|------------------------------------------|-----------|-------------------------------------------------------------------------------------------------------------------|
| GO Biological Process | mitotic cell cycle                       | 2.53E-03  | CCNB1; CDC2; CDKN1A; CKS1B; DCTN2; EML4; GMNN; ORC3L; RFC4; RPA3                                                  |
| GO Biological Process | cell cycle                               | 3.48E-03  | CCNB1; CDC2; CDKN1A; CKS1B; DCTN2; EML4; GAJ; GMNN; ORC3L; PSMD8; RAD50; RFC4; RPA3; SLC12A4                      |
| GO Biological Process | cell proliferation                       | 4.38E-03  | CCNB1; CDC2; CDKN1A; CKS1B; DCTN2; EML4; FLJ12484; GAJ; GMNN; MDM4; ORC3L; PSMD8; RAD50; RFC4; RPA3; SLC12A4; TXN |
| GO Biological Process | nuclear division                         | 1.20E-02  | CCNB1; CDC2; DCTN2; EML4; GAJ; RAD50                                                                              |
| GO Biological Process | M phase                                  | 1.39E-02  | CCNB1; CDC2; DCTN2; EML4; GAJ; RAD50                                                                              |
| GO Cellular Component | vacuole                                  | 1.93E-02  | CSE-C; DPP7; MAN2B1; PSAP; TXN                                                                                    |
| GO Molecular Function | protein kinase activity                  | 2.40E-02  | CDC2; CDKN1A; CKS1B; DYRK2; FGFR1; HRI; MAP3K10; PRPF4B; SRPK1                                                    |
| GO Cellular Component | replication fork                         | 3.71E-02  | ORC3L; RFC4; RPA3                                                                                                 |
| GO Molecular Function | protein serine/threonine kinase activity | 4.89E-02  | CDC2; CKS1B; DYRK2; HRI; MAP3K10; PRPF4B; SRPK1                                                                   |



| Genes that are associated with G2 checkpoint function by Bayesian analysis |               |           |           |        |                            |
|----------------------------------------------------------------------------|---------------|-----------|-----------|--------|----------------------------|
| SUID                                                                       | GeneSymbol    | CLID      | Accession | LLID   | ChromosomeLocat Cytoband   |
| AGI_HUM1_OLIGO_A_24_P37319                                                 | ACSL3         | Hs.471461 | AB061712  | 2181   | chr2:224001811-2:2q36.1    |
| AGI_HUM1_OLIGO_A_23_P312179                                                | ALMS1         | Hs.184720 | AB002326  | 7840   | chr2:73802351-73:2p13.1    |
| AGI_HUM1_OLIGO_A_23_P20970                                                 | APG12L        | Hs.264482 | BC011033  | 9140   | chr5:115243648-115q22.3    |
| AGI_HUM1_OLIGO_A_24_P144527                                                | ARV1          | Hs.275736 | AK026629  | 64801  | chr1:228159182-2:1q42.2    |
| AGI_HUM1_OLIGO_A_23_P159539                                                | ASMTL         | Hs.533514 | AK090498  | 8623   | chrY:1167635-116:Yp22.33   |
| AGI_HUM1_OLIGO_A_23_P412526                                                | BCAP29        | Hs.303787 | NM_018844 | 55973  | chr7:106795072-1:7q22.3    |
| AGI_HUM1_OLIGO_A_24_P346210                                                | BTN2A2        | Hs.373938 | BC017497  | 10385  | chr6:26498308-26:6p22.2    |
| AGI_HUM1_OLIGO_A_23_P97853                                                 | C10orf57      | Hs.169982 | NM_025125 | 80195  | chr10:81516617-81:10q22.3  |
| AGI_HUM1_OLIGO_A_24_P116233                                                | C13orf1       | Hs.44235  | AF055016  | 57213  | chr13:48293707-4:13q14.2   |
| AGI_HUM1_OLIGO_A_24_P860797                                                | C13orf9       | Hs.109520 | AK094335  | 51028  | chr2:71391562-71:2p13.3    |
| AGI_HUM1_OLIGO_A_23_P99579                                                 | C14orf142     | Hs.20142  | NM_032490 | 84520  | chr14:91660044-91:14q32.12 |
| AGI_HUM1_OLIGO_A_23_P25913                                                 | C14orf168     | Hs.525445 | NM_031427 | 83544  | chr14:72146251-7:14q24.3   |
| AGI_HUM1_OLIGO_A_24_P330303                                                | C14orf31      | Hs.434914 | NM_152330 | 122786 | chr14:50186666-5:14q22.1   |
| AGI_HUM1_OLIGO_A_23_P100141                                                | C16orf28      | Hs.161279 | NM_023076 | 65259  | chr16:1355346-13:16p13.3   |
| AGI_HUM1_OLIGO_A_23_P412554                                                | C18orf25      | Hs.116486 | NM_145055 | 147339 | chr18:42095005-4:18q21.1   |
| AGI_HUM1_OLIGO_A_32_P234722                                                | C19orf13      | Hs.407368 | NM_015578 | 26065  |                            |
| AGI_HUM1_OLIGO_A_23_P120364                                                | C20orf149     | Hs.79625  | NM_024299 | 79144  | chr20:62879788-6:20q13.33  |
| AGI_HUM1_OLIGO_A_23_P386241                                                | C20orf55      | Hs.534072 | NM_031424 | 83541  | chr20:821839-82:20p13      |
| AGI_HUM1_OLIGO_A_23_P40433                                                 | C21orf63      | Hs.208358 | NM_058187 | 59271  | chr21:32750413-3:21q22.11  |
| AGI_HUM1_OLIGO_A_23_P307761                                                | CABLES2       | Hs.301040 | BC003122  | 81928  | chr20:61649348-6:20q13.33  |
| AGI_HUM1_OLIGO_A_23_P307940                                                | CAPZA2        | Hs.446123 | NM_006136 | 830    | chr7:116112391-1:7q31.2    |
| AGI_HUM1_OLIGO_A_23_P50020                                                 | COG1          | Hs.283109 | NM_018714 | 9382   | chr17:71800463-7:17q25.1   |
| AGI_HUM1_OLIGO_A_24_P10657                                                 | CTL2          | Hs.515134 | NM_020428 | 57153  | chr19:10615558-1:19p13.2   |
| AGI_HUM1_OLIGO_A_24_P115762                                                | CTSC          | Hs.128065 | NM_148170 | 1075   | chr11:87747550-8:11q14.2   |
| AGI_HUM1_OLIGO_A_24_P944144                                                | DATF1         | Hs.517172 | AB002331  | 11083  | chr20:62245012-6:20q13.33  |
| AGI_HUM1_OLIGO_A_23_P47839                                                 | DDX55         | Hs.286173 | AB046815  | 57696  | chr12:122457722-1:12q24.31 |
| AGI_HUM1_OLIGO_A_23_P14975                                                 | DKFZP434A1319 | Hs.307084 | NM_032140 | 84080  | chr16:67473326-6:16q22.1   |
| AGI_HUM1_OLIGO_A_24_P316364                                                | DKFZP566E144  | Hs.7527   | BC003502  | 25996  | chr11:113858220-1:11q23.2  |
| AGI_HUM1_OLIGO_A_24_P221414                                                | DNC1          | Hs.440364 | NM_004411 | 1780   | chr7:95338844-95:7q21.3    |
| AGI_HUM1_OLIGO_A_24_P365807                                                | EFNB1         | Hs.144700 | NM_004429 | 1947   | chrX:66928624-66:Xq13.1    |
| AGI_HUM1_OLIGO_A_24_P913374                                                | EIF4EBP2      | Hs.522995 | AK001936  | 1979   | chr10:71531037-7:10q22.1   |
| AGI_HUM1_OLIGO_A_23_P50331                                                 | FAM32A        | Hs.4766   | NM_014077 | 26017  | chr19:16162870-1:19p13.12  |
| AGI_HUM1_OLIGO_A_24_P784846                                                | FBXO22        | Hs.458959 | AK021906  | 26263  | chr15:73937039-7:15q24.2   |
| AGI_HUM1_OLIGO_A_23_P85716                                                 | FCGR2A        | Hs.352642 | NM_021642 | 2212   | chr1:158756796-1:1q23.3    |
| AGI_HUM1_OLIGO_A_23_P417237                                                | FEM1C         | Hs.47367  | NM_020177 | 56929  | chr5:114936731-1:5q22.3    |
| AGI_HUM1_OLIGO_A_32_P213086                                                | FLJ21865      | Hs.29288  | NM_022759 | 64772  |                            |
| AGI_HUM1_OLIGO_A_24_P20139                                                 | FLJ37953      | Hs.204619 | AK095272  | 129450 | chr2:201003224-2:2q33.1    |
| AGI_HUM1_OLIGO_A_24_P235049                                                | FTHFSDC1      | Hs.268698 | NM_015440 | 25902  | chr6:151444631-1:6q25.1    |
| AGI_HUM1_OLIGO_A_23_P69908                                                 | GLRX          | Hs.28988  | NM_002064 | 2745   | chr5:95223935-95:5q15      |
| AGI_HUM1_OLIGO_A_24_P294233                                                | GLS           | Hs.116448 | NM_014905 | 2744   | chr2:192032316-1:2q32.2    |
| AGI_HUM1_OLIGO_A_23_P311732                                                | GNG12         | Hs.431101 | NM_018841 | 55970  | chr1:67539947-67:1p31.2    |
| AGI_HUM1_OLIGO_A_24_P39654                                                 | GRB2          | Hs.444356 | NM_002086 | 2885   | chr17:73925945-7:17q25.1   |
| AGI_HUM1_OLIGO_A_24_P274640                                                | GTF2H2        | Hs.191356 | NM_001515 | 2966   | chr5:68988965-68:5q13.2    |
| AGI_HUM1_OLIGO_A_24_P916141                                                | HAN11         | Hs.410596 | AK025925  | 10238  | chr17:62144552-6:17q23.3   |
| AGI_HUM1_OLIGO_A_23_P25403                                                 | HCFC2         | Hs.506558 | NM_013320 | 29915  | chr12:102999562-1:12q23.3  |
| AGI_HUM1_OLIGO_A_24_P371670                                                | HNRPA0        | Hs.96996  | NM_006805 | 10949  | chr5:137165622-1:5q31.2    |
| AGI_HUM1_OLIGO_A_24_P33077                                                 | HOXB2         | Hs.514289 | NM_002145 | 3212   | chr17:47095623-4:17q21.32  |
| AGI_HUM1_OLIGO_A_23_P40588                                                 | HSC20         | Hs.182898 | NM_172002 | 150274 | chr22:27466507-2:22q12.1   |
| AGI_HUM1_OLIGO_A_24_P377277                                                | HSPA4         | Hs.90093  | X67643    | 3308   | chr5:132511544-1:5q31.1    |
| AGI_HUM1_OLIGO_A_24_P48983                                                 | JM11          | Hs.522643 | BC008769  | 90060  | chrX:47951394-47:Xp11.23   |
| AGI_HUM1_OLIGO_A_23_P213661                                                | KIAA0433      | Hs.212046 | NM_015216 | 23262  | chr5:102615015-1:5q21.1    |
| AGI_HUM1_OLIGO_A_24_P72518                                                 | KIAA0828      | Hs.195058 | NM_015328 | 23382  | chr7:128622911-1:7q32.1    |
| AGI_HUM1_OLIGO_A_23_P38876                                                 | LIPE          | Hs.95351  | NM_005357 | 3991   | chr19:47597658-4:19q13.2   |
| AGI_HUM1_OLIGO_A_24_P475556                                                | LOC146346     | Hs.109731 | AK057359  | 146346 | chr16:74261081-7:16q22.3   |
| AGI_HUM1_OLIGO_A_23_P143958                                                | LOC200916     | Hs.380933 | AL110170  | 200916 | chr3:171905176-1:3q26.2    |
| AGI_HUM1_OLIGO_A_24_P940620                                                | LOC284001     | Hs.307972 | BC040264  | 284001 | chr17:80794406-8:17q25.3   |
| AGI_HUM1_OLIGO_A_24_P649388                                                | LOC348926     | Hs.455099 | BM561118  | 348926 | chr21:32760422-3:21q22.11  |
| AGI_HUM1_OLIGO_A_24_P100673                                                | LOC51234      | Hs.250905 | NM_016454 | 51234  | chr15:32238195-3:15q14     |
| AGI_HUM1_OLIGO_A_24_P393811                                                | LOC54499      | Hs.93832  | NM_019026 | 54499  | chr1:162899844-1:1q24.1    |
| AGI_HUM1_OLIGO_A_23_P122007                                                | LOC90355      | Hs.482976 | NM_033211 | 90355  | chr5:102690028-1:5q21.1    |
| AGI_HUM1_OLIGO_A_24_P93316                                                 | LOC96610      | Hs.449601 | AK026408  | 96610  | chr22:20998101-2:22q11.22  |
| AGI_HUM1_OLIGO_A_23_P207319                                                | MAP3K14       | Hs.404183 | NM_003954 | 9020   | chr17:43816190-4:17q21.31  |
| AGI_HUM1_OLIGO_A_32_P47566                                                 | MGC10067      | Hs.190447 | BC013425  | 134510 | chr5:158683117-1:5q33.3    |
| AGI_HUM1_OLIGO_A_23_P410613                                                | MGC17943      | Hs.257664 | NM_152261 | 90488  | chr12:105870000-1:12q23.3  |
| AGI_HUM1_OLIGO_A_24_P96171                                                 | MGC4093       | Hs.31895  | NM_030578 | 80776  | chr19:46552230-4:19q13.2   |
| AGI_HUM1_OLIGO_A_32_P112655                                                | MGC5509       | Hs.303899 | AK058000  | 79074  | chr2:105572364-1:2q12.1    |
| AGI_HUM1_OLIGO_A_23_P142310                                                | MKNK2         | Hs.515032 | NM_017572 | 2872   | chr19:1988572-19:19p13.3   |
| AGI_HUM1_OLIGO_A_23_P8339                                                  | MRPL18        | Hs.416998 | NM_014161 | 29074  | chr6:160128382-1:6q25.3    |
| AGI_HUM1_OLIGO_A_23_P113623                                                | MRPL45        | Hs.462913 | NM_032351 | 84311  | chr17:36853876-3:17q12     |
| AGI_HUM1_OLIGO_A_23_P117727                                                | MIFMT         | Hs.531615 | NM_139242 | 123263 | chr15:63014288-6:15q22.31  |
| AGI_HUM1_OLIGO_A_24_P285831                                                | NDUFB5        | Hs.518424 | NM_002492 | 4711   | chr3:180654694-1:3q26.33   |
| AGI_HUM1_OLIGO_A_23_P415984                                                | NPAS2         | Hs.156832 | NM_002518 | 4862   | chr2:101228706-1:2q11.2    |

|                             |           |           |           |        |                            |
|-----------------------------|-----------|-----------|-----------|--------|----------------------------|
| AGI_HUM1_OLIGO_A_32_P49423  | NPM1      | Hs.519452 | NM_002520 | 4869   | chr5:170813246-175q35.1    |
| AGI_HUM1_OLIGO_A_24_P270376 | NUFIP1    | Hs.525006 | BC017745  | 26747  | chr13:43315659-4:13q14.12  |
| AGI_HUM1_OLIGO_A_24_P241183 | OCIL      | Hs.268326 | NM_013269 | 29121  | chr12:9724817-97:12p13.31  |
| AGI_HUM1_OLIGO_A_24_P414183 | OGG1      | Hs.380271 | NM_016819 | 4968   | chr3:9774021-977:3p25.3    |
| AGI_HUM1_OLIGO_A_24_P65949  | PDXK      | Hs.284491 | BC021550  | 8566   | chr21:44013499-4:21q22.3   |
| AGI_HUM1_OLIGO_A_23_P159671 | PHKA2     | Hs.54941  | NM_000292 | 5256   | chrX:18272745-18: Xp22.13  |
| AGI_HUM1_OLIGO_A_23_P134464 | PMPCB     | Hs.184211 | NM_004279 | 9512   | chr7:102513216-1:7q22.1    |
| AGI_HUM1_OLIGO_A_32_P73796  | PPM1E     | Hs.245044 | NM_014906 | 22843  | chr17:57536431-57:17q23.2  |
| AGI_HUM1_OLIGO_A_23_P110725 | PRKAA1    | Hs.43322  | NM_006251 | 5562   | chr5:40808534-40:5p13.1    |
| AGI_HUM1_OLIGO_A_24_P390909 | PRX       | Hs.205457 | AF321192  | 57716  | chr19:45596552-4:19q13.2   |
| AGI_HUM1_OLIGO_A_32_P61757  | PTPN11    | Hs.506852 | BC030949  | 5781   | chr12:111359534-1:12q24.13 |
| AGI_HUM1_OLIGO_A_24_P125871 | RIPK4     | Hs.517310 | NM_020639 | 54101  | chr21:42045288-4:21q22.3   |
| AGI_HUM1_OLIGO_A_24_P937582 | RNASEH1   | Hs.502765 | AK027610  | 246243 | chr2:3154680-315:2p25.3    |
| AGI_HUM1_OLIGO_A_23_P48408  | RNMT      | Hs.8086   | NM_003799 | 8731   | chr18:13754222-1:18p11.21  |
| AGI_HUM1_OLIGO_A_23_P417363 | RSNL2     | Hs.122927 | AK057267  | 79745  | chr2:29371946-29:2p23.2    |
| AGI_HUM1_OLIGO_A_24_P354523 | SCYE1     | Hs.480465 | NM_004757 | 9255   | chr4:107728818-1:4q24      |
| AGI_HUM1_OLIGO_A_24_P926972 | SENP3     | Hs.513926 | AK000923  | 26168  | chr17:7669688-76:17p13.1   |
| AGI_HUM1_OLIGO_A_32_P63913  | SF3A3     | Hs.77897  | BC002395  | 10946  | chr1:37847039-37:1p34.3    |
| AGI_HUM1_OLIGO_A_23_P87684  | SIAT8A    | Hs.408614 | X77922    | 6489   |                            |
| AGI_HUM1_OLIGO_A_32_P15389  | SIVA      | Hs.112058 | NM_021709 | 10572  |                            |
| AGI_HUM1_OLIGO_A_24_P64182  | SLC2A8    | Hs.179522 | NM_014580 | 29988  | chr9:125545507-1:9q33.3    |
| AGI_HUM1_OLIGO_A_23_P501372 | SMCR7     | Hs.534534 | NM_139162 | 125170 | chr17:18369454-1:17p11.2   |
| AGI_HUM1_OLIGO_A_23_P58466  | SMN2      | Hs.202179 | NM_000344 | 6607   | chr5:69077604-69:5q13.2    |
| AGI_HUM1_OLIGO_A_23_P383977 | SNAPC5    | Hs.30174  | NM_006049 | 10302  | chr15:64503507-6:15q22.31  |
| AGI_HUM1_OLIGO_A_24_P341882 | TESK1     | Hs.79358  | NM_006285 | 7016   | chr9:35599401-35:9p13.3    |
| AGI_HUM1_OLIGO_A_23_P378526 | TNFRSF6B  | Hs.434878 | NM_016434 | 8771   | chr20:63053756-6:20q13.33  |
| AGI_HUM1_OLIGO_A_23_P407718 | TRIM59    | Hs.212957 | NM_173084 | 286827 | chr3:161476786-1:3q25.33   |
| AGI_HUM1_OLIGO_A_32_P76720  | TU12B1-TY | Hs.48428  | NM_016575 | 51559  | chr12:102669370-1:12q23.3  |
| AGI_HUM1_OLIGO_A_24_P316619 | UBE2H     | Hs.344165 | U25433    | 7328   | chr7:129090155-1:7q32.2    |
| AGI_HUM1_OLIGO_A_24_P265135 | UBE3C     | Hs.118351 | BC014029  | 9690   | chr7:156417464-1:7q36.3    |
| AGI_HUM1_OLIGO_A_23_P114164 | UBQLN2    | Hs.522668 | NM_013444 | 29978  | chrX:55559844-55: Xp11.21  |
| AGI_HUM1_OLIGO_A_24_P188325 | UCHL5     | Hs.145469 | BC025369  | 51377  | chr1:190278571-1:1q31.2    |
| AGI_HUM1_OLIGO_A_24_P51375  | VIL2      | Hs.487027 | AF351612  | 7430   | chr6:159130012-1:6q11.2    |
| AGI_HUM1_OLIGO_A_24_P362394 | VPS45A    | Hs.443750 | NM_007259 | 11311  | chr1:147271493-1:1q21.2    |
| AGI_HUM1_OLIGO_A_24_P242299 | ZNF265    | Hs.194718 | NM_005455 | 9406   | chr1:70899188-70:1p31.1    |

GO analysis results

System Gene Category

GO Biological regulation of protein biosynthesis

GO Molecular hydrolase activity

GO Biological regulation of biosynthesis

GO Molecular catalytic activity

GO Cellular C mitochondrion

GO Biological RNA metabolism

GO Molecular RNA binding

EASE score Gene Symbol

1.10E-02 EIF4EBP2; MKNK2; PRKAA1

2.53E-02 C13ORF9; CTSC; DKFZP566E144; FLJ21865; GLS; GNG12; KIAA0433; KIAA0828;

LIPE; MGC10067; OGG1; PMPCB; PPM1E; PTPN11; RNASEH1; SENP3; UCHL5

2.63E-02 EIF4EBP2; MKNK2; PRKAA1

3.26E-02 ARV1; ASMTL; C13ORF9; CTSC; DKFZP434A1319; DKFZP566E144; FBXO22; FLJ21865; GLRX; GLS;

GNG12; KIAA0433; KIAA0828; LIPE; MAP3K14; MGC10067; MGC4093; MKNK2; MTFMT; NDUFB5;

OGG1; PDXK; PHKA2; PMPCB; PPM1E; PRKAA1; PTPN11; RNASEH1; RNMT; SENP3; SIAT8A;

TESK1; TNFRSF6B; UCHL5

3.80E-02 C13ORF9; DKFZP566E144; GLS; MRPL18; MRPL45; MTFMT; NDUFB5; OGG1; PMPCB; RNASEH1

4.55E-02 HNRPA0; NUFIP1; RNASEH1; RNMT; SCYE1; SF3A3; ZNF265

4.63E-02 HNRPA0; NPM1; NUFIP1; RNASEH1; RNMT; SCYE1; SF3A3; ZNF265

Genes that are associated with G1 checkpoint function by SAM analysis

| SUID                        | GeneSymbol | CLID      | Accession | LLID   | ChromosomeLocation          | Cytoband |
|-----------------------------|------------|-----------|-----------|--------|-----------------------------|----------|
| AGI_HUM1_OLIGO_A_23_P200298 | AGL        | Hs.904    | NM_000028 | 178    | chr1:99852152-99852211      | 1p21.2   |
| AGI_HUM1_OLIGO_A_24_P201531 | ARCN1      | Hs.33642  | NM_001655 | 372    | chr11:118010634-118010693   | 11q23.3  |
| AGI_HUM1_OLIGO_A_32_P50275  | CD59       | Hs.278573 | AK095453  | 966    | chr11:33692213-33692272     | 11p13    |
| AGI_HUM1_OLIGO_A_24_P171549 | CDC47      | Hs.470654 | AK075134  | 83879  | chr2:174435437-174435496    | 2q31.1   |
| AGI_HUM1_OLIGO_A_24_P89457  | CDKN1A     | Hs.370771 | L47232    | 1026   | chr6:36699033-36699092      | 6p21.31  |
| AGI_HUM1_OLIGO_A_23_P45917  | CKS1B      | Hs.374378 | NM_001826 | 1163   | chr1:152168319-152168378    | 1q22     |
| AGI_HUM1_OLIGO_A_23_P52610  | DDB2       | Hs.446564 | NM_000107 | 1643   | chr11:47224932-47224991     | 11p11.2  |
| AGI_HUM1_OLIGO_A_23_P24414  | EFEMP2     | Hs.381870 | AB030655  | 30008  | chr11:65410842-65410783     | 11q13.1  |
| AGI_HUM1_OLIGO_A_24_P222844 | FLJ10330   | Hs.342307 | NM_018061 | 55119  | chr1:108589168-108589227    | 1p13.3   |
| AGI_HUM1_OLIGO_A_24_P193509 | FLJ31153   | Hs.514179 | BC022321  | 123811 | chr16:15940120-15933885     | 16p13.11 |
| AGI_HUM1_OLIGO_A_32_P45493  | FUSIP1     | Hs.3530   | NM_006625 | 10772  | chr1_random:1393456-1393397 |          |
| AGI_HUM1_OLIGO_A_23_P55251  | ITGA3      | Hs.265829 | NM_005501 | 3675   | chr17:48642003-48642062     | 17q21.33 |
| AGI_HUM1_OLIGO_A_24_P925586 | MTVR1      | Hs.25723  | AF085877  | 23625  | chr11:65112557-65112498     | 11q13.1  |
| AGI_HUM1_OLIGO_A_23_P12140  | RPL5       | Hs.532359 | NM_000969 | 6125   | chr1:92770931-92770990      | 1p22.1   |
| AGI_HUM1_OLIGO_A_23_P389391 | SLC12A4    | Hs.10094  | NM_005072 | 6560   | chr16:67754821-67754762     | 16q22.1  |
| AGI_HUM1_OLIGO_A_32_P64966  | TPTE       | Hs.122986 | NM_013315 | 7179   | chr21:10010084-10007359     | 21p11.2  |

Genes that are associated with G2 checkpoint function by SAM analysis

| SUID                        | GeneSymt | CLID      | Accession | LLID  | ChromosomeLocation      |
|-----------------------------|----------|-----------|-----------|-------|-------------------------|
| AGI_HUM1_OLIGO_A_23_P32021  | FANCC    | Hs.494529 | NM_000136 | 2176  | chr9:93202990-93202931  |
| AGI_HUM1_OLIGO_A_24_P390909 | PRX      | Hs.205457 | AF321192  | 57716 | chr19:45596552-45596493 |
